# Supplementary material for: Proteomic and Bioinformatics Analyses of Mouse Liver Microsomes
Source: PubMed Central journal article supplement (PMC3317213; doi:10.1155/2012/832569), 2012-03-20
Supplement: 832569.f1.pdf [file 832569.f1.pdf]

# Supplemental Figures

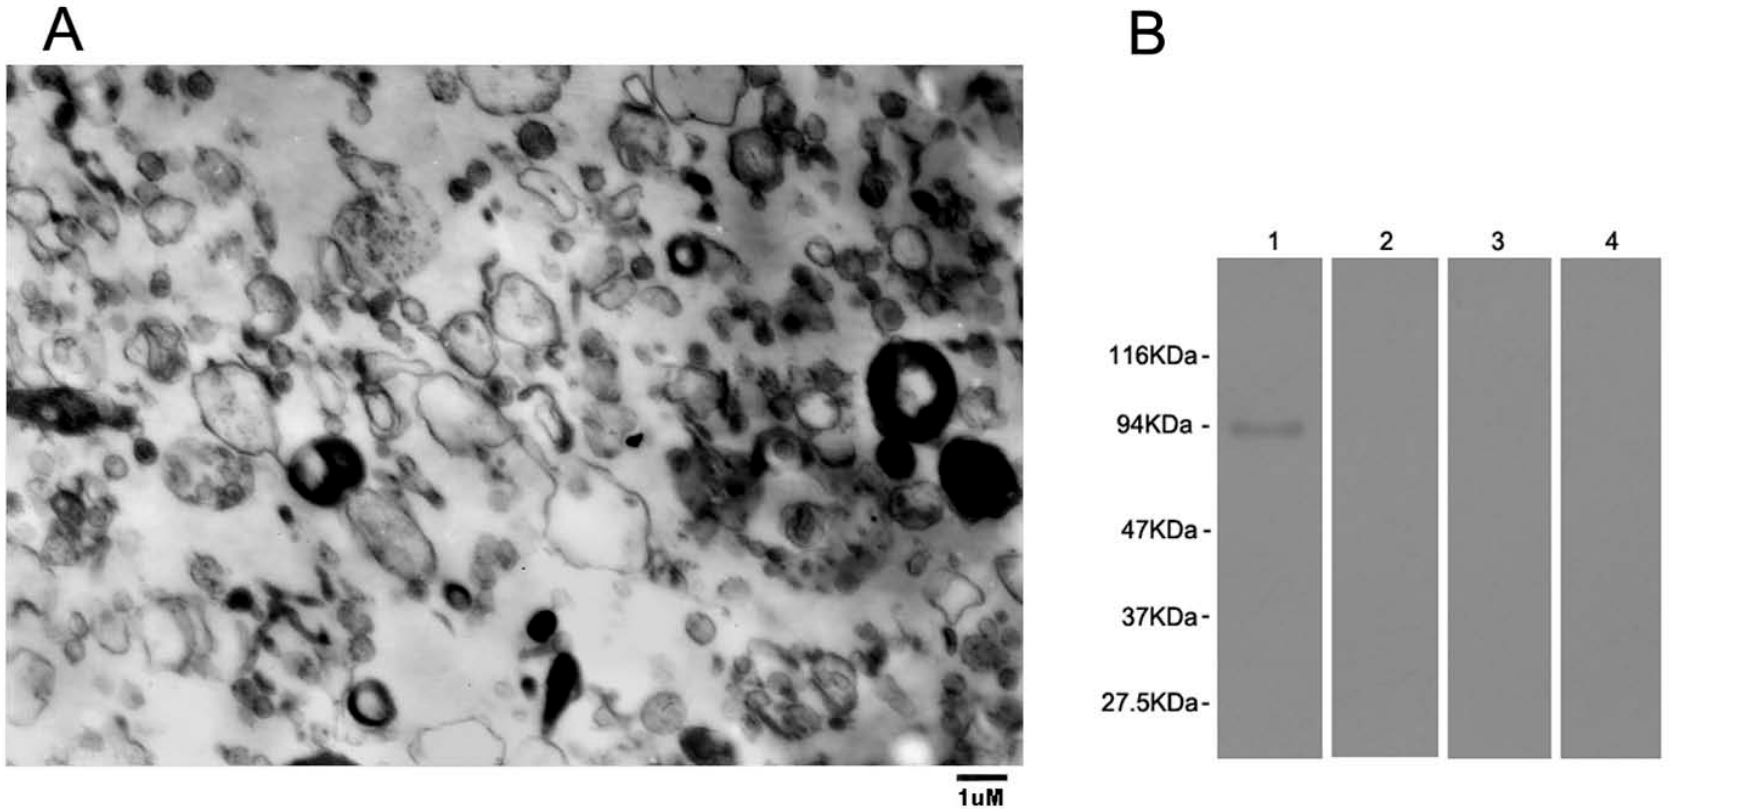

**Supplemental Figure 1. Detection and validation of the purity of isolated microsomes.** A. Electron microscope image. A representative area of ER vesicles was shown without apparent other apparatus contamination, observed with electron microscope. B. Western blotting image. A amount (50  $\mu$ g) of proteins were loaded at each lane, and lanes 1, 2, 3 and 4 were sequentially detected with anti-endoplasmic reticulum (92.5 kDa; ER marker), anti-OxPhos Complex IV subunit I (56.9 kDa; mitochondrial marker), anti-Catalase (59.8 kDa; peroxisomal marker), and anti-cadherin (98.3 kDa; cytoplasmic marker), respectively.

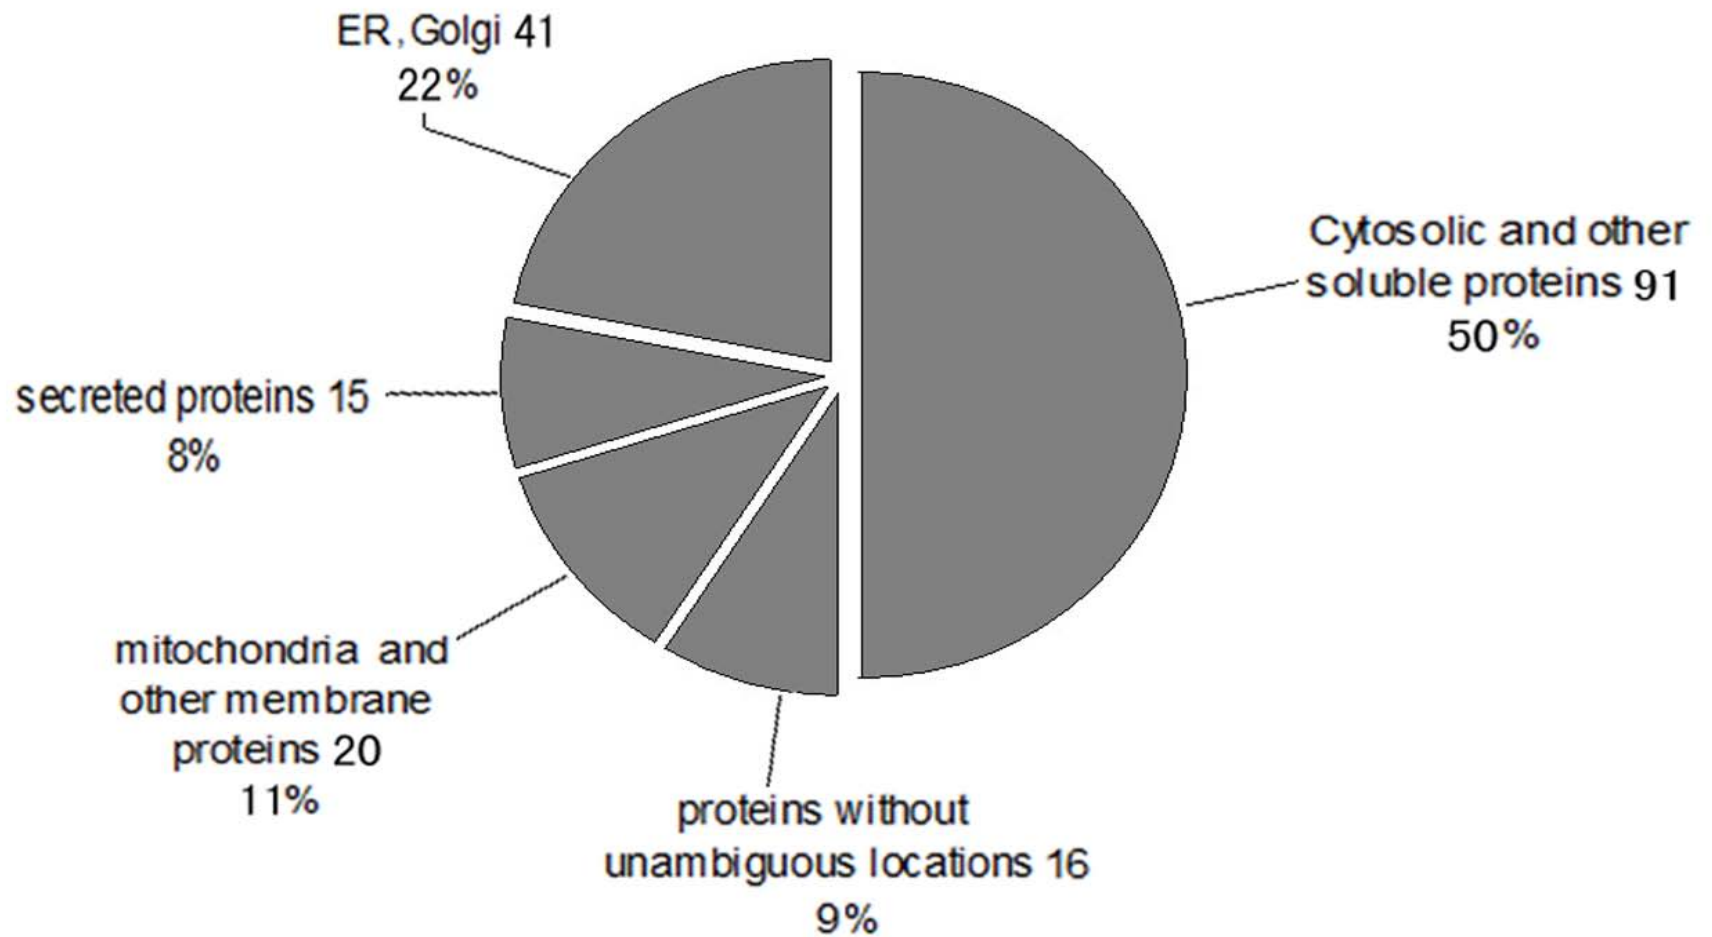

**Supplemental Figure 2. Distribution of subcellular locations of 2DE-derived proteins.** The subcellular locations were derived from Swiss-Prot Database and the Gene Ontology.

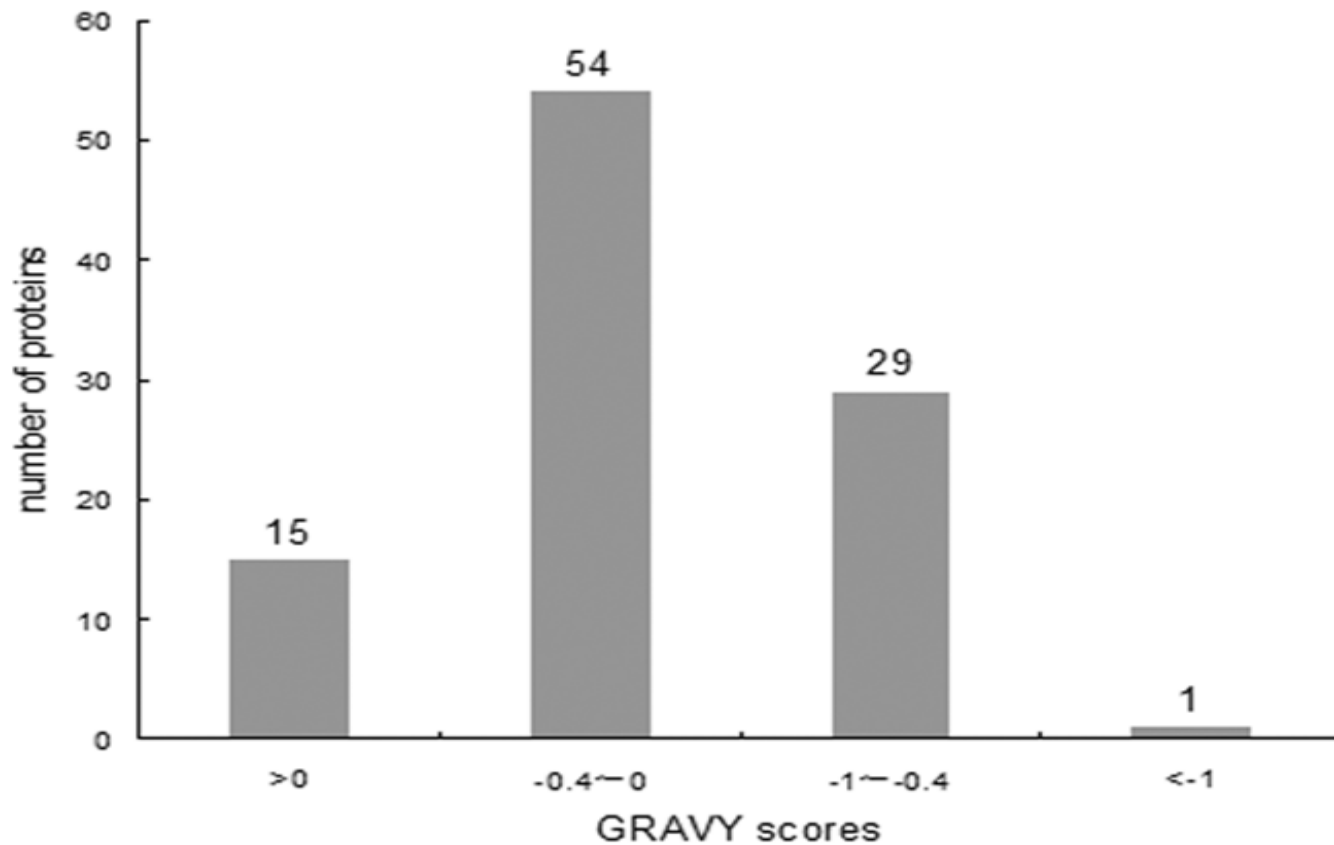

**Supplemental Figure 3. Distribution of 1DE-derived proteins over the GRAVY scores.** The value (-0.4) is the mean GRAVY score for cytosolic proteins; it is the borderline between cytosolic proteins and membrane proteins. A score  $>-0.4$  indicates probability for membrane association (the higher the score is, the greater the probability is).

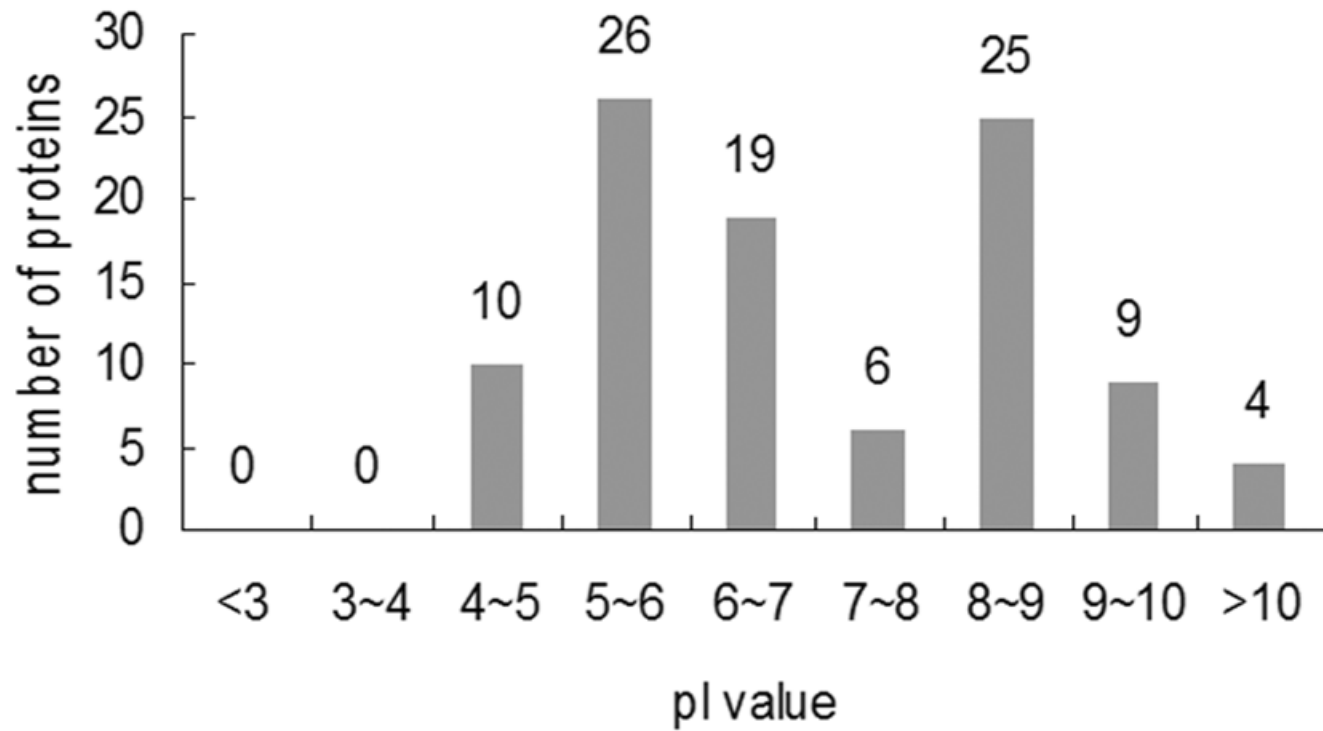

Supplemental Figure 4. Distribution of 1DE-derived proteins over the pI values.

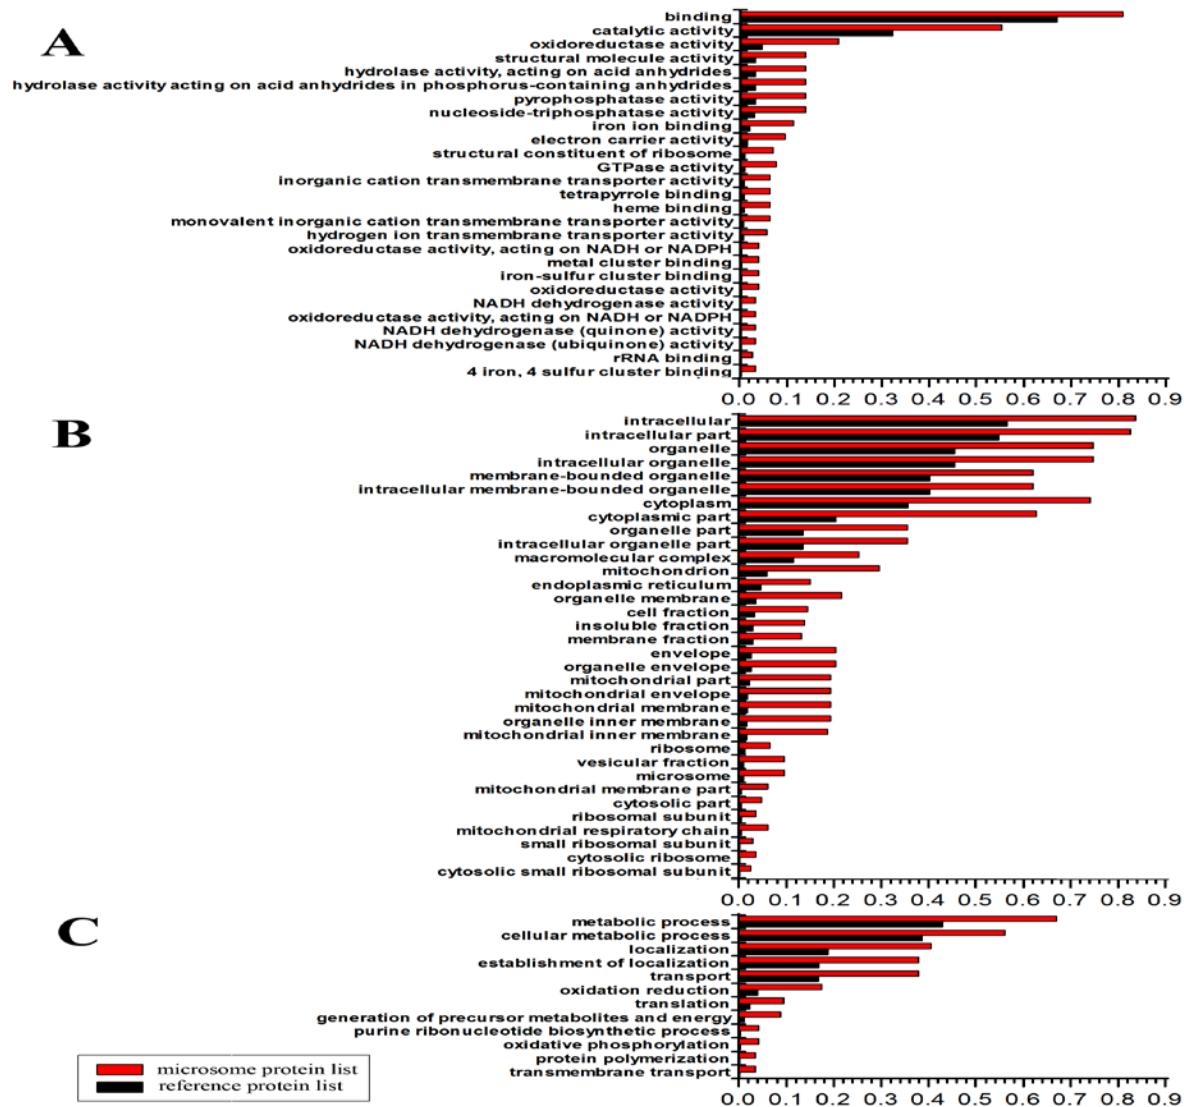

**Supplemental Figure 5. Significant enrichment of GO terms for mouse liver microsomes proteins (n = 259) that were derived from 1DE and 2DE strategies.** The set of identified microsomes proteins was compared with the reference list of IPI entries (provided by BinGO), and significantly over-represented GO terms (P < 0.01) are shown. The ratio shown is the number of microsomes and reference IPI proteins annotated to each GO term divided by the number of microsomes and reference IPI proteins linked to at least one annotation term within the indicated GO cellular component(A), molecular function(B), and biological process categories(C).
